# Supplementary material
Source: PubMed Central journal article supplement (PMC5879141)
Supplement: AnnalsATS.201709-713OC_copeland_data_supplement.pdf [file AnnalsATS.201709-713OC_copeland_data_supplement.pdf]

## **Online Data Supplement**

### **Paratracheal Paraseptal Emphysema and Expiratory Central Airway Collapse in Smokers**

Carla R. Copeland, MD, Hrudaya Nath, MD, Nina L. J. Terry, MD, JD, Carla G. Wilson, MS, Young-Il Kim, PhD, David A. Lynch, MD, Sandeep Bodduluri, PhD, J. Michael Wells, MD, Mark T. Dransfield, MD, Alejandro A. Díaz, MD, George R. Washko, MD, Marilyn G. Foreman, MD, Surya P. Bhatt, MD, for the Genetic Epidemiology of COPD (COPDGene) Investigators

**Supplemental Table 1: Visual Analysis of Lung Parenchyma and Airways on Computed Tomography in Participants with and without ECAC**

| Variable                                 |                             | Total<br>(n=1320) | Controls<br>(n=880) | ECAC<br>(n=440) |
|------------------------------------------|-----------------------------|-------------------|---------------------|-----------------|
| <b>Centrilobular Emphysema</b>           |                             |                   |                     |                 |
|                                          | <b>None</b>                 | 463 (35.1%)       | 317 (36.0%)         | 146 (33.2%)     |
|                                          | <b>Trace</b>                | 220 (16.7%)       | 160 (18.2%)         | 60 (13.6%)      |
|                                          | <b>Mild</b>                 | 259 (19.6%)       | 160 (18.2%)         | 99 (22.5%)      |
|                                          | <b>Moderate</b>             | 151 (11.4%)       | 94 (10.7%)          | 57 (13.0%)      |
|                                          | <b>Confluent</b>            | 134 (10.2%)       | 83 (9.4%)           | 51 (11.6%)      |
|                                          | <b>Advanced Destructive</b> | 94 (7.1%)         | 67 (7.6%)           | 27 (6.1%)       |
|                                          | <b>Substantial*</b>         | 379 (28.7%)       | 244 (27.7%)         | 135 (30.7%)     |
| <b>Paraseptal Emphysema</b>              |                             |                   |                     |                 |
|                                          | <b>None</b>                 | 829 (62.8%)       | 571 (64.9%)         | 258 (58.6%)     |
|                                          | <b>Mild</b>                 | 297 (22.5%)       | 174 (19.8%)         | 123 (28.0%)     |
|                                          | <b>Substantial</b>          | 193 (14.6%)       | 134 (15.2%)         | 59 (13.4%)      |
| <b>Paratracheal Paraseptal Emphysema</b> |                             | 177 (13.4%)       | 104 (11.8%)         | 73 (16.6%)      |
| <b>Bronchial Wall Thickening</b>         |                             |                   |                     |                 |
|                                          | <b>None</b>                 | 421 (31.9%)       | 330 (37.5%)         | 91 (20.7%)      |
|                                          | <b>Borderline</b>           | 517 (39.2%)       | 305 (34.7%)         | 212 (48.2%)     |
|                                          | <b>Definite</b>             | 382 (28.9%)       | 245 (27.8%)         | 137 (31.1%)     |

\*Substantial Centrilobular Emphysema = Presence of any of moderate, confluent or advanced destructive centrilobular emphysema.

**Supplemental Table 2: Multivariable Associations with ECAC\***

| <b>Variable</b>                                                    | <b>OR (95% CI)</b> | <b>p value</b> |
|--------------------------------------------------------------------|--------------------|----------------|
| <b>Age (per 1 year increase)</b>                                   | 1.02 (1.01-1.04)   | 0.002          |
| <b>Male Sex (vs. Female)</b>                                       | 0.79 (0.60-1.04)   | 0.10           |
| <b>African American Race (vs. White)</b>                           | 0.88 (0.65-1.18)   | 0.38           |
| <b>BMI (per 1 unit increase)</b>                                   | 1.04 (1.02-1.05)   | <0.001         |
| <b>Current Smoker (vs. Current Non-smoker)</b>                     | 0.93 (0.73-1.18)   | 0.55           |
| <b>Pack- year Smoking History (for every 1 pack-year increase)</b> | 1.00 (0.99-1.00)   | 0.66           |
| <b>FEV<sub>1</sub>, liters (for every 1 liter increase)</b>        | 0.72 (0.53-0.96)   | 0.03           |
| <b>Paratracheal PSE (vs. no Paratracheal PSE)</b>                  | 1.53 (1.18-1.98)   | 0.001          |

ECAC = Expiratory Central Airway Collapse. BMI = Body-mass-index. FEV<sub>1</sub> = Forced expiratory volume in the first second. PSE = Paraseptal emphysema.

\*Conditional logistic regression model with blocking for GOLD (Global Initiative for Obstructive Lung Disease) stage.

**Supplemental Table 3: Baseline Characteristics of participants with and without expiratory central airway collapse (ECAC) in participants with expiratory scans at FRC**

| <b>Variable</b>                          | <b>Overall<br/>(n=1065)</b> | <b>Controls<br/>(n=736)</b> | <b>ECAC<br/>(n=329)</b> |
|------------------------------------------|-----------------------------|-----------------------------|-------------------------|
| <b>Age, years</b>                        | 61.9 (9.1)                  | 60.9 (9.0)                  | 64.1 (8.9)              |
| <b>Male Sex (%)</b>                      | 558 (42.3%)                 | 344 (46.7%)                 | 102 (31.0%)             |
| <b>African American Race (%)</b>         | 233 (17.7%)                 | 165 (22.4%)                 | 66 (20.1%)              |
| <b>Body-mass-index, kg/m<sup>2</sup></b> | 29.5 (6.7)                  | 28.9 (6.6)                  | 31.1 (6.7)              |
| <b>Pack-years of smoking</b>             | 46.7 (28.1)                 | 46.4 (28.8)                 | 47.3 (26.7)             |
| <b>Current Smoker (%)</b>                | 459 (34.8%)                 | 293 (39.8%)                 | 102 (31.0%)             |
| <b>FEV<sub>1</sub>, liters</b>           | 1.92 (0.90)                 | 2.01 (0.93)                 | 1.72 (0.79)             |
| <b>FEV<sub>1</sub>, %predicted</b>       | 68.8 (27.4)                 | 69.8 (27.9)                 | 66.5 (26.1)             |
| <b>FVC, liters</b>                       | 2.99 (1.00)                 | 3.10 (1.03)                 | 2.74 (0.90)             |
| <b>FVC, %predicted</b>                   | 82.3 (19.8)                 | 82.9 (19.9)                 | 80.9 (19.3)             |
| <b>FEV<sub>1</sub>/FVC</b>               | 0.63 (0.17)                 | 0.63 (0.17)                 | 0.62 (0.17)             |

FRC = Functional residual capacity. FEV<sub>1</sub> = Forced expiratory volume in the first second. FVC = Forced vital capacity.

**Supplemental Table 4: Multivariable Associations between Emphysema Subtypes and Airway Disease with Expiratory Central Airway Collapse in participants with expiratory scans at FRC**

| <b>Variable</b>                                  | <b>Crude OR<br/>(95%CI)</b> | <b>p Value</b> | <b>Adjusted OR*<br/>(95% CI)</b> | <b>p Value</b> |
|--------------------------------------------------|-----------------------------|----------------|----------------------------------|----------------|
| Substantial Centrilobular emphysema <sup>‡</sup> | 1.38 (1.05-1.82)            | 0.02           | 1.16 (0.87- 1.54)                | 0.31           |
| Substantial Paraseptal emphysema                 | 1.00 (0.70-1.43)            | 0.99           | 1.21 (0.89-1.66)                 | 0.22           |
| Definite Bronchial Wall Thickening               | 1.21 (0.92-1.59)            | 0.18           | 1.09 (0.85-1.40)                 | 0.51           |
| Paratracheal Paraseptal emphysema                | 1.55 (1.08-2.21)            | 0.02           | 1.51 (1.13-2.03)                 | 0.005          |

\*Adjusted for age, sex, race, BMI, pack-years smoking history, current smoking status, and FEV<sub>1</sub>, with conditional blocking by GOLD (Global Initiative for Obstructive Lung Disease) stage.

<sup>‡</sup>Substantial Centrilobular Emphysema = Presence of any of moderate, confluent or advanced destructive centrilobular emphysema.
